# Supplementary material for: Cerebrospinal fluid p-tau217 performs better than p-tau181 as a biomarker of Alzheimer’s disease
Source: PubMed Central journal article supplement (PMC7125218; doi:10.1038/s41467-020-15436-0), 2020-04-03
Supplement: 41467_2020_15436_MOESM1_ESM.pdf [file 41467_2020_15436_MOESM1_ESM.pdf]

## **Supplementary Information**

### **Cerebrospinal fluid p-tau217 performs better than p-tau181 as a biomarker of Alzheimer's disease**

**Janelidze et al.**

#### **Supplementary Methods**

Selectivity for phosphorylated tau compared with non-phosphorylated tau in assay buffer was shown through comparison of the signal generated by the standard curve with the signal generated from levels of non-phosphorylated tau up to 1000 pg/mL. Non-phosphorylated tau (4R2N) did not generate significant signal at any levels tested, up to 1000 pg/mL (Supplementary Fig. 6a). In addition, the signal generated by the phosphorylated standard could be specifically blocked by the co-incubation of pT217 containing peptide (6 µg/mL) but not a pT181 containing peptide (6 µg/mL, Supplementary Fig. 6b). In order to confirm that the signal observed in human CSF sample is also specific, samples were analyzed with and without the coincubation of 6µg/mL of either pT217 or pT181 peptides. This resulted in complete blocking of the signal with the pT217 peptide but not with the pT181 peptide (Supplementary Fig. 6c).

**Supplementary Table 1.** Spearman correlations between CSF p-tau and t-tau.

|                                   | p-tau217 | p-tau181 | p-value<br>p-tau217 vs. p-tau181 |
|-----------------------------------|----------|----------|----------------------------------|
| All (n=194)                       | 0.896    | 0.936    | <0.001                           |
| CU (n=65)                         | 0.866    | 0.934    | <0.001                           |
| A $\beta$ <sup>+</sup> MCI (n=29) | 0.896    | 0.943    | <0.001                           |
| AD dementia (n=43)                | 0.923    | 0.947    | 0.047                            |
| Non-AD (n=57)                     | 0.792    | 0.855    | 0.004                            |

Data are Spearman correlation coefficients with all p value <0.001. Differences between the correlation coefficients were tested using estimated Spearman coefficients and method described in Rosner et al.<sup>1</sup>.

AD, Alzheimer's disease; CSF, cerebrospinal fluid; CU, cognitively unimpaired; MCI, mild cognitive impairment.

**Supplementary Table 2.** Spearman correlations between CSF tau variants and amyloid biomarkers.

|                  | [ <sup>18</sup> F]flutemetamol PET                 | CSF A $\beta$ 42                                       |
|------------------|----------------------------------------------------|--------------------------------------------------------|
| <b>Cohort 1</b>  | n=138                                              | n=184                                                  |
| p-tau181         | <b>0.600 (7.7x10<sup>-15</sup>)</b>                | <b>-0.464 (3.3x10<sup>-11</sup>)</b>                   |
| p-tau217         | <b>0.654 (3.5x10<sup>-18</sup>)<sup>a</sup></b>    | <b>-0.518 (5.2x10<sup>-14</sup>)<sup>b</sup></b>       |
| p-tau181/t-tau   | <b>0.687 (1.4x10<sup>-20</sup>)</b>                | <b>-0.583 (3.8x10<sup>-18</sup>)<sup>b, d</sup></b>    |
| p-tau217/t-tau   | <b>0.700 (1.4x10<sup>-21</sup>)<sup>c</sup></b>    | <b>-0.612 (2.6x10<sup>-20</sup>)<sup>b, e</sup></b>    |
| t-tau            | <b>0.449 (3.2x10<sup>-8</sup>)</b>                 | <b>-0.313 (1.6x10<sup>-5</sup>)</b>                    |
| Braak I-II ROI   | <b>0.640 (3.1x10<sup>-17</sup>)</b>                | <b>-0.387 (5.8x10<sup>-8</sup>)</b>                    |
| Braak III-IV ROI | <b>0.586 (4.3x10<sup>-14</sup>)</b>                | <b>-0.410 (7.6x10<sup>-9</sup>)</b>                    |
| Braak V-VI ROI   | <b>0.513 (1.3x10<sup>-10</sup>)</b>                | <b>-0.330 (5.0x10<sup>-6</sup>)</b>                    |
| <b>Cohort 2</b>  | n=330                                              | n=350                                                  |
| p-tau181         | <b>0.612 (2.4x10<sup>-35</sup>)</b>                | <b>-0.280 (9.9x10<sup>-8</sup>)</b>                    |
| p-tau217         | <b>0.666 (1.3x10<sup>-43</sup>)<sup>f</sup></b>    | <b>-0.402 (4.6x10<sup>-15</sup>)<sup>b</sup></b>       |
| p-tau181/t-tau   | <b>0.662 (5.4x10<sup>-43</sup>)<sup>g</sup></b>    | <b>-0.488 (2.5x10<sup>-22</sup>)<sup>b, h</sup></b>    |
| p-tau217/t-tau   | <b>0.726 (3.1x10<sup>-55</sup>)<sup>b, e</sup></b> | <b>-0.587 (1.0x10<sup>-33</sup>)<sup>b, e, i</sup></b> |
| t-tau            | <b>0.485 (7.6x10<sup>-21</sup>)</b>                | <b>-0.169 (0.001)</b>                                  |
| Braak I-II ROI   | N/A                                                | N/A                                                    |
| Braak III-IV ROI | N/A                                                | N/A                                                    |
| Braak V-VI ROI   | N/A                                                | N/A                                                    |

Data are Spearman correlation coefficients (p-value) with significant results shown in bold.

Differences between the correlation coefficients were tested using estimated Spearman coefficients and method described in Rosner et al.<sup>1</sup>. Correlation coefficients were consistently lower for t-tau and Tau PET measures than for p-tau181 and therefore these biomarkers were excluded from the analysis.

<sup>a</sup>p=0.004 compared with p-tau181; <sup>b</sup>p<0.001 compared with p-tau181; <sup>c</sup>p=0.032 compared with p-tau181; <sup>d</sup>p=0.005 compared with p-tau217; <sup>e</sup>p<0.001 compared with p-tau217; <sup>f</sup>p=0.004 compared with p-tau181/t-tau; <sup>g</sup>p=0.010 compared with p-tau181; <sup>h</sup>p=0.002 compared with p-tau217; <sup>i</sup>p<0.001 compared with p-tau181/t-tau.

N/A is used to indicate missing data.

CSF, cerebrospinal fluid; PET, positron emission tomography; ROI, region of interest.

**Supplementary Table 3.** ROC analysis of CSF tau variants for distinguishing different diagnostic groups.

|                    | CU A $\beta$ <sup>-</sup> vs<br>CU A $\beta$ <sup>+</sup> | CU A $\beta$ <sup>-</sup> vs<br>A $\beta$ <sup>+</sup> MCI | CU A $\beta$ <sup>-</sup> vs<br>AD | CU A $\beta$ <sup>-</sup> vs<br>non-AD | CU A $\beta$ <sup>+</sup> vs<br>A $\beta$ <sup>+</sup> MCI | CU A $\beta$ <sup>+</sup> vs<br>AD           | CU A $\beta$ <sup>+</sup> vs<br>non-AD | A $\beta$ <sup>+</sup> MCI vs<br>AD | A $\beta$ <sup>+</sup> MCI vs<br>non-AD | AD vs<br>non-AD                            |
|--------------------|-----------------------------------------------------------|------------------------------------------------------------|------------------------------------|----------------------------------------|------------------------------------------------------------|----------------------------------------------|----------------------------------------|-------------------------------------|-----------------------------------------|--------------------------------------------|
| p-tau181           | <b>0.803</b><br>(0.695-0.911)                             | <b>0.988</b><br>(0.964-1.00)                               | <b>0.935</b><br>(0.869-1.00)       | 0.463<br>(0.338-0.588)                 | <b>0.853</b><br>(0.766-0.939)                              | <b>0.827</b><br>(0.736-0.917)                | <b>0.775</b><br>(0.681-0.868)          | 0.513<br>(0.376-0.650)              | <b>0.961</b><br>(0.922-1.00)            | <b>0.914</b><br>(0.848-0.980)              |
| p-tau217           | <b>0.840</b> <sup>a</sup><br>(0.742-0.938)                | <b>0.996</b><br>(0.986-1.00)                               | <b>0.967</b><br>(0.921-1.00)       | 0.515<br>(0.388-0.642)                 | <b>0.883</b><br>(0.805-0.960)                              | <b>0.881</b> <sup>c</sup><br>(0.806-0.957)   | <b>0.782</b><br>(0.688-0.875)          | 0.564<br>(0.428-0.700)              | <b>0.966</b><br>(0.929-1.00)            | <b>0.943</b> <sup>g</sup><br>(0.892-0.994) |
| p-tau181/t-<br>tau | <b>0.843</b><br>(0.747-0.939)                             | <b>0.990</b><br>(0.974-1.00)                               | <b>0.972</b><br>(0.926-1.00)       | 0.534<br>(0.411-0.657)                 | <b>0.864</b><br>(0.779-0.948)                              | <b>0.925</b> <sup>d</sup><br>(0.862-0.988)   | <b>0.758</b><br>(0.662-0.853)          | <b>0.649</b><br>(0.517-0.780)       | <b>0.947</b><br>(0.902-0.992)           | <b>0.954</b><br>(0.902-1.00)               |
| p-tau217/t-<br>tau | <b>0.868</b> <sup>b</sup><br>(0.782-0.954)                | <b>0.999</b><br>(0.994-1.000)                              | <b>0.980</b><br>(0.943-1.00)       | 0.580<br>(0.455-0.704)                 | <b>0.907</b><br>(0.837-0.977)                              | <b>0.950</b> <sup>e, f</sup><br>(0.895-1.00) | <b>0.770</b><br>(0.674-0.866)          | <b>0.691</b><br>(0.566-0.817)       | <b>0.964</b><br>(0.925-1.00)            | <b>0.960</b> <sup>h</sup><br>(0.913-1.00)  |
| t-tau              | <b>0.711</b><br>(0.585-0.837)                             | <b>0.948</b><br>(0.894-1.00)                               | <b>0.845</b><br>(0.751-0.939)      | 0.452<br>(0.323-0.581)                 | <b>0.823</b><br>(0.728-0.919)                              | <b>0.725</b><br>(0.615-0.836)                | <b>0.715</b><br>(0.614-0.817)          | 0.452<br>(0.320-0.585)              | <b>0.916</b><br>(0.858-0.974)           | <b>0.830</b><br>(0.744-0.917)              |

Data are shown as AUC (95% CI) with significant results shown in bold. For AUC values >0.800, AUCs of two ROC curves were compared with DeLong test<sup>2</sup>. AUCs were consistently lower for t-tau than for p-tau181 and therefore t-tau was excluded from the analysis. <sup>a</sup>p=0.022 compared with p-tau181; <sup>b</sup>p=0.046 compared with p-tau181; <sup>c</sup>p=8.1x10<sup>-05</sup> compared with p-tau181; <sup>d</sup>p=0.005 compared with p-tau181; <sup>e</sup>p=0.001 compared with p-tau181; <sup>f</sup>p=0.013 compared with p-tau217; <sup>g</sup>p=0.026 compared with p-tau181; <sup>h</sup>p=0.034 compared with p-tau181.

AD, Alzheimer's disease; AUC, area under the curve; CI, confidence interval; CU, cognitively unimpaired; MCI, mild cognitive impairment; ROC, Receiver Operating Characteristic.

**Supplementary Table 4.** Demographic and clinical characteristics of the validation cohort.

|                         | Amyloid Positive Mild AD<br>n=32 |
|-------------------------|----------------------------------|
| Age, <i>years</i>       | 73 (8)                           |
| Sex F/M, <i>n</i>       | 13/19                            |
| Education, <i>years</i> | 15 (2)                           |
| MMSE                    | 23 (2)                           |
| p-tau217, <i>pg/ml</i>  | 918 (773)                        |
| p-tau181, <i>pg/ml</i>  | 442 (313)                        |

Data are shown as mean (SD) unless otherwise specified.

AD, Alzheimer's disease dementia; F, female; M, male; MMSE, Mini Mental State Examination.

**Supplementary Table 5.** Performance of the p-tau217 and p-tau181 assays.

| Sample                | Mean concentration, pg/ml | SD    | N  | % CV |
|-----------------------|---------------------------|-------|----|------|
| <b>p-tau217</b>       |                           |       |    |      |
| 10 pg/mL QC           | 9.97                      | 0.59  | 22 | 5.95 |
| 50 pg/mL QC           | 44.31                     | 2.06  | 22 | 4.66 |
| High Control Sample   | 737.99                    | 40.96 | 22 | 5.55 |
| Medium Control Sample | 328.72                    | 17.81 | 22 | 5.42 |
| Low Control Sample    | 59.69                     | 4.93  | 22 | 8.26 |
| <b>p-tau181</b>       |                           |       |    |      |
| 10 pg/mL QC           | 9.49                      | 0.24  | 22 | 2.53 |
| 50 pg/mL QC           | 45.84                     | 1.05  | 22 | 2.29 |
| High Control Sample   | 379.61                    | 21.25 | 22 | 5.60 |
| Medium Control Sample | 190.27                    | 7.29  | 22 | 3.83 |
| Low Control Sample    | 71.19                     | 3.92  | 22 | 5.51 |

CV, coefficient of variation; QC, quality control; SD, standard deviation.

## Supplementary Figure 1

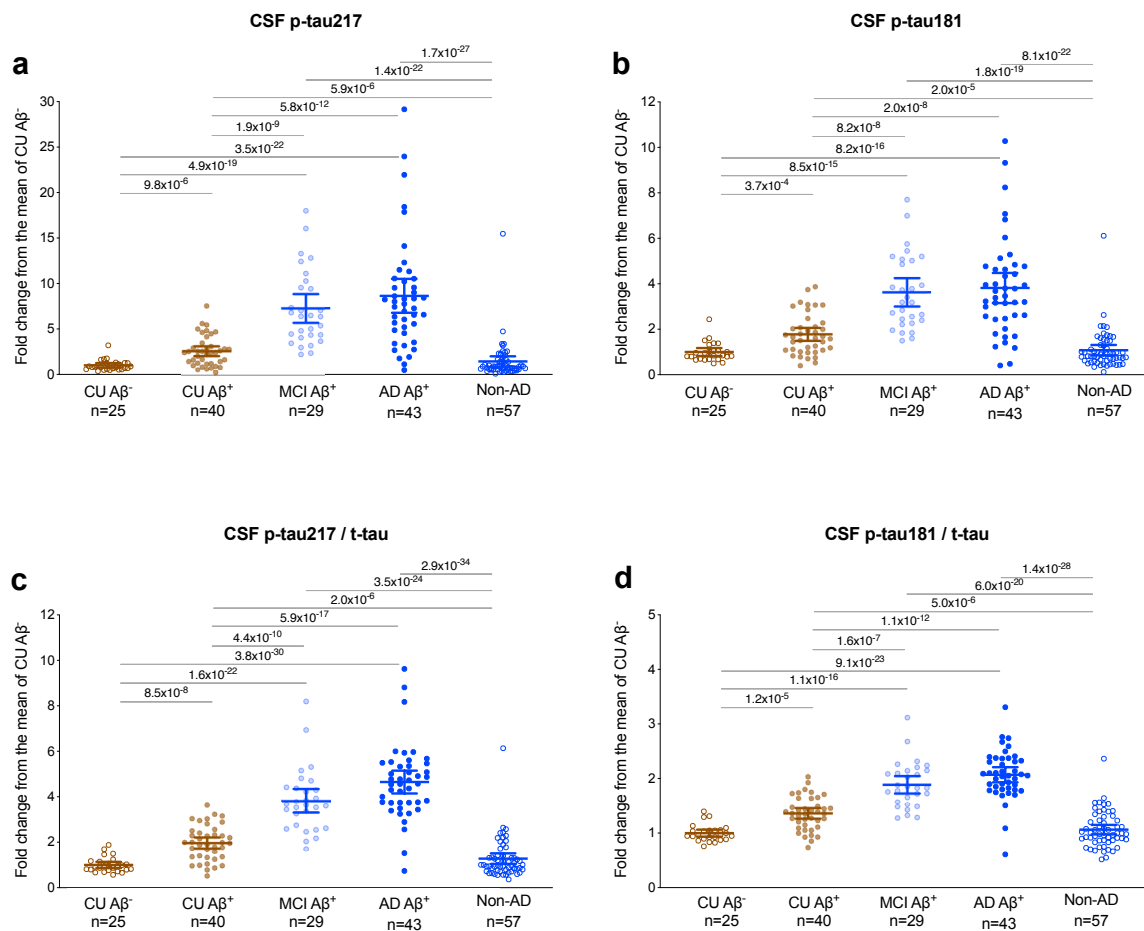

**Scatter plots of CSF p-tau in diagnostic groups.** CSF p-tau in CU Aβ<sup>+</sup> (n=40), MCI Aβ<sup>+</sup> (n=29), AD Aβ<sup>+</sup> (n=43) and non-AD neurodegenerative disorders (n=57). **(a)** CSF p-tau217, scatter plot for Figure 1a; **(b)** CSF p-tau181, scatter plot for Figure 1b; **(c)** CSF p-tau217/t-tau, scatter plot for Figure 1c; and **(d)** CSF p-tau181/t-tau in CU Aβ<sup>+</sup> (n=25), scatter plot for Figure 1d. P values (unadjusted for multiple comparisons) are from univariate general linear models adjusted for age and sex; solid horizontal lines represent mean and error bars correspond to 95% confidence interval.

## Supplementary Figure 2

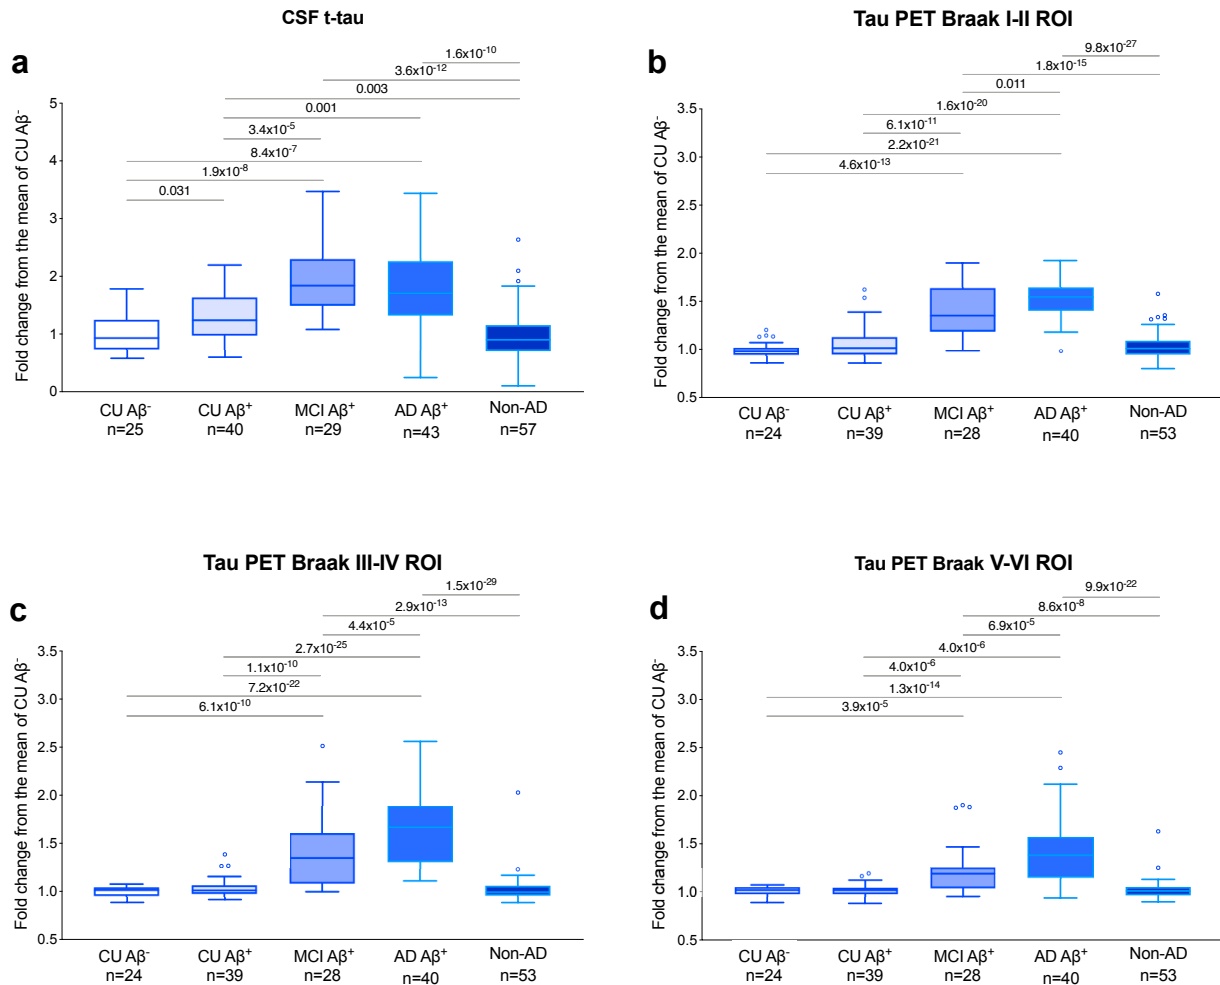

**CSF t-tau and [<sup>18</sup>F]flortaucipir in diagnostic groups.** CSF t-tau (a) and [<sup>18</sup>F]flortaucipir retention in Braak I-II (b), III-IV (c) and V-VI (d) ROI in CU Aβ<sup>+</sup> (n=25 for t-tau, n=24 for Tau PET), CU Aβ<sup>+</sup> (n=40 for t-tau, n=39 for Tau PET), MCI Aβ<sup>+</sup> (n=29 for t-tau, n=28 for Tau PET), AD Aβ<sup>+</sup> (n=43 for t-tau, n=40 for Tau PET) and non-AD neurodegenerative disorders (n=57 for t-tau, n=53 for Tau PET). Non-AD neurodegenerative disorders group included 10 PD, 17 PDD, 6 PSP, 7 DLB, 7 CBS, 4 SD and 6 bvFTD patients. P values (unadjusted for multiple comparisons) are from univariate general linear models adjusted for age and sex; boxes show interquartile range, the horizontal lines are medians and the whiskers were plotted using Tukey method. Data in partially overlapping cohort have been previously published<sup>3</sup> and are shown here for comparison. Abbreviations: AD, Alzheimer's disease; bvFTD, behavioral-variant frontotemporal dementia; CBS, corticobasal syndrome; CSF, cerebrospinal fluid; CU, cognitively unimpaired controls; DLB, dementia with Lewy bodies; MCI, Mild Cognitive Impairment; PD, Parkinson's disease; PDD, Parkinson's disease with dementia; PSP, progressive supranuclear palsy; SD semantic dementia.



### Supplementary Figure 3

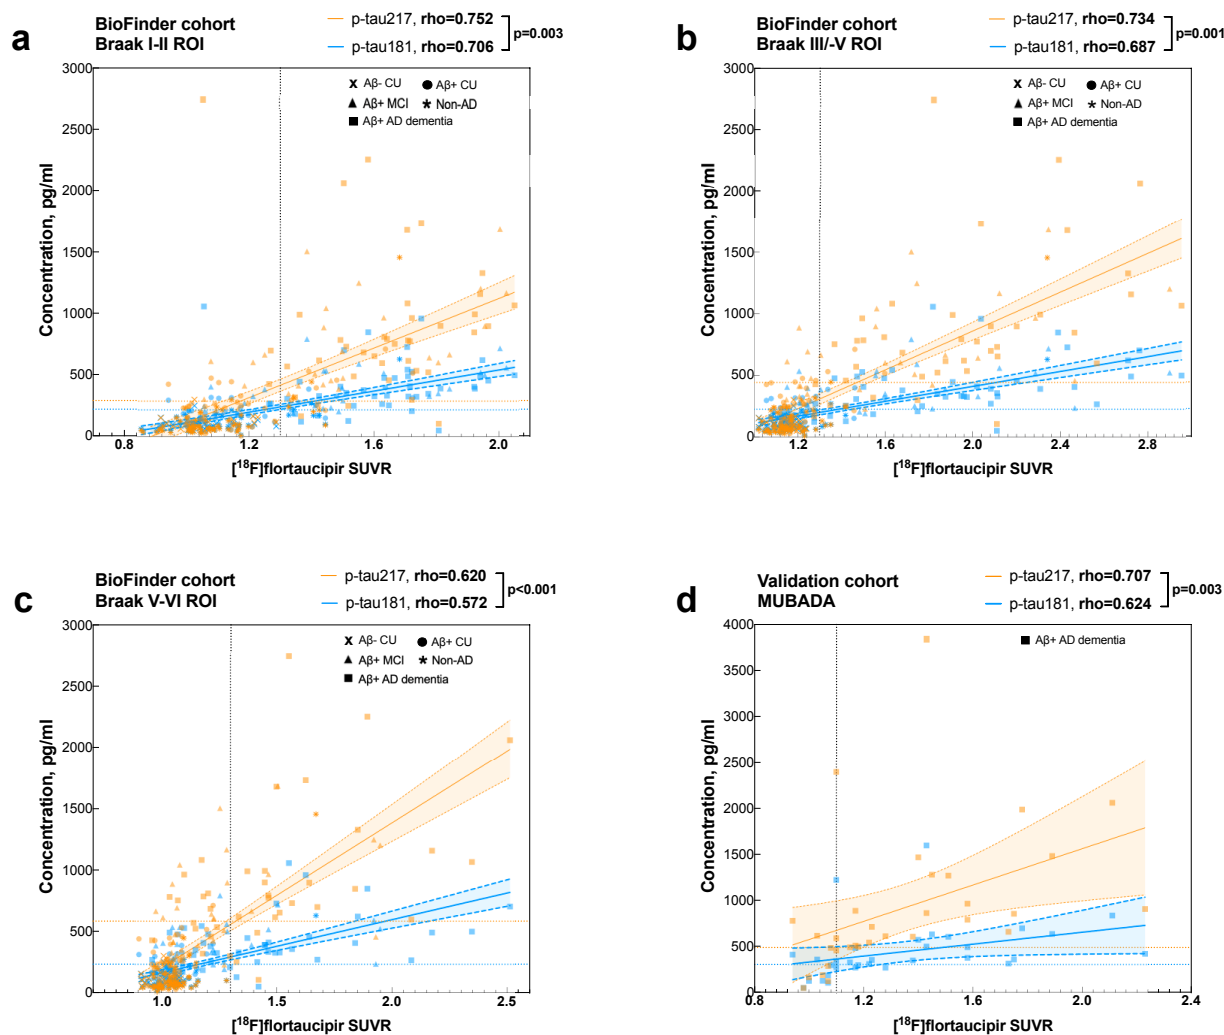

**Associations between [18F]flortaucipir and p-tau.** (a-c) BioFINDER cohort, associations between [18F]flortaucipir retention in *a priori* defined brain regions linked to tau pathology in AD and CSF p-tau217 and p-tau181. (d) Validation cohort, associations between [18F]flortaucipir MUBADA SUVR and CSF p-tau217 and p-tau181. Data are shown as Spearman correlation coefficients ( $\rho$ ); lines are linear regression lines with 95% CI (shaded area). Dotted lines indicate [18F]flortaucipir SUVR cutoffs and Youden's index cutoffs for CSF p-tau217 and p-tau181. Differences between the correlation coefficients were tested using estimated Spearman coefficients and method described in Rosner et al.<sup>1</sup>. Abbreviations: ROI, region of interest; SUVR, standardized uptake value ratio.

## Supplementary Figure 4

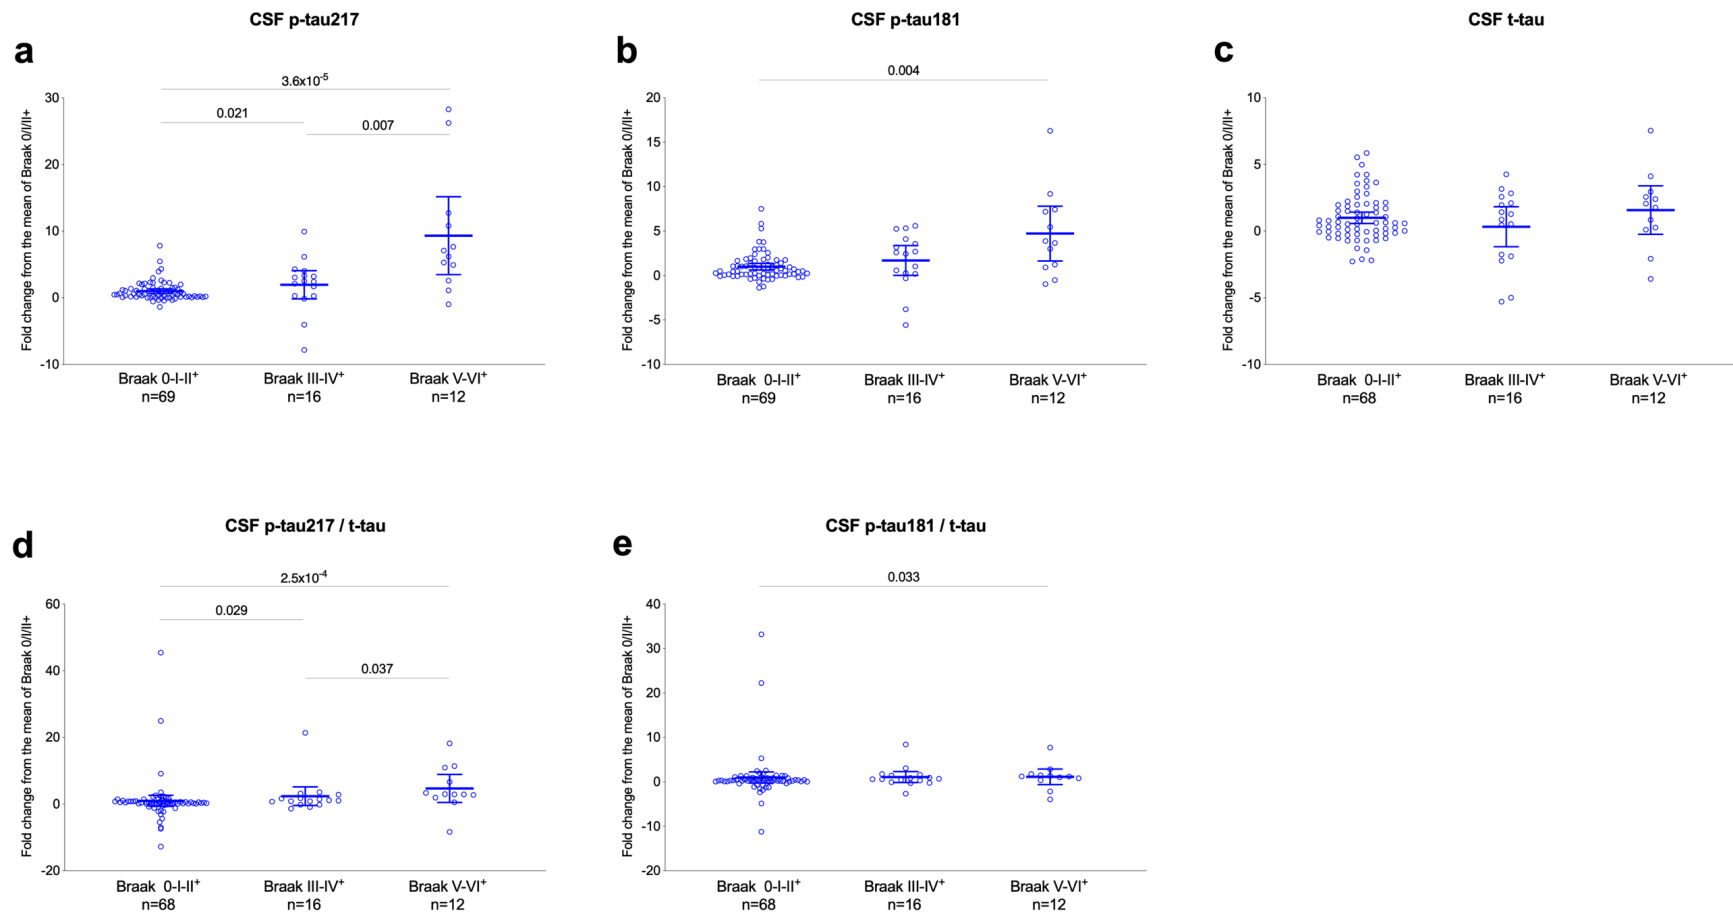

**Scatter plots of longitudinal changes in CSF p-tau.** Study participants were staged into different Braak ROI groups using [<sup>18</sup>F]flortaucipir PET. [<sup>18</sup>F]flortaucipir data was dichotomized based on the SUVR cutoff of 1.326. Annual changes in CSF p-tau217 (**a**, scatter plot for Figure 3a), p-tau181 (**b**, scatter plot for Figure 3b), t-tau (**c**, scatter plot for Figure 3c), p-tau217/t-tau (**d**, scatter plot for Figure 3d), and p-tau181/t-tau (**e**, scatter plot for Figure 3e) in the Braak 0-I-II (normal [<sup>18</sup>F]flortaucipir retention or abnormal [<sup>18</sup>F]flortaucipir retention limited to ROI I-II, n=69), III-IV (abnormal [<sup>18</sup>F]flortaucipir retention in ROIs III-IV, n=16) and V-VI (abnormal [<sup>18</sup>F]flortaucipir retention in ROI V-VI, n=12) groups. P values (unadjusted for multiple comparisons) are from Mann-Whitney test; solid horizontal lines represent mean and error bars correspond to 95% confidence interval.

## Supplementary Figure 5

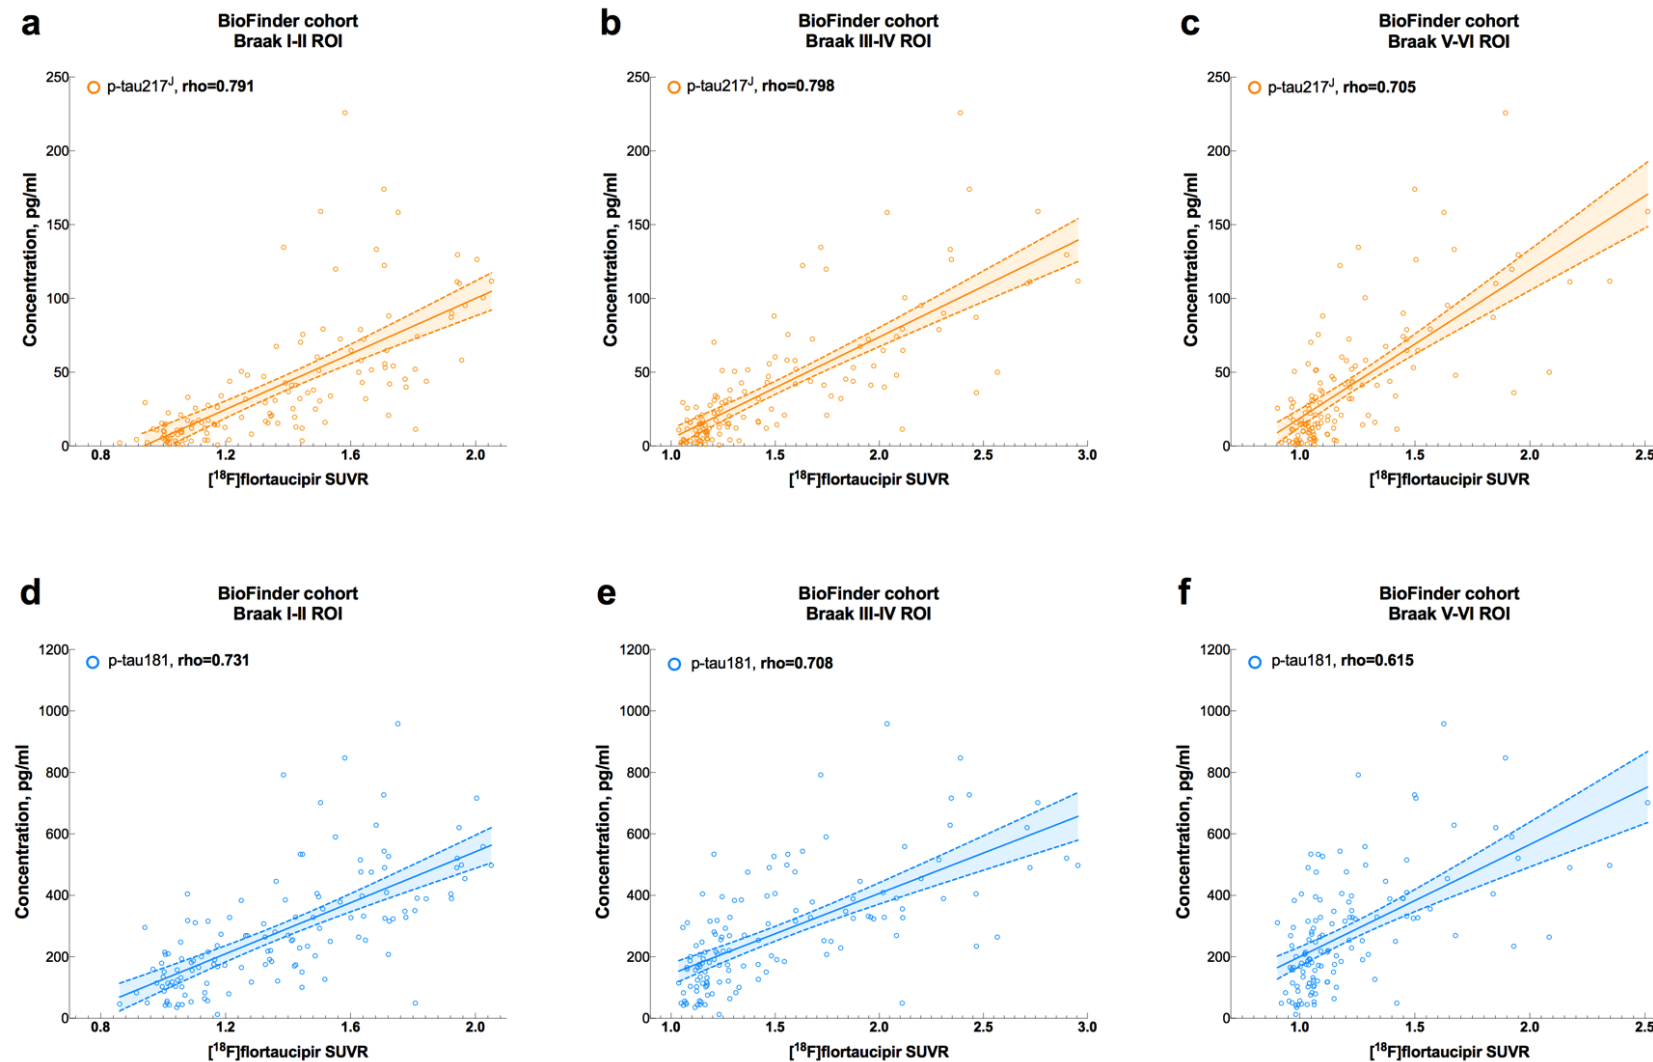

**Associations between  $[^{18}\text{F}]$ flortaucipir and p-tau.** BioFINDER cohort, associations between  $[^{18}\text{F}]$ flortaucipir retention in *a priori* defined brain regions linked to tau pathology in AD and CSF p-tau217<sup>J</sup> (a-c) and p-tau181 (d-f) in A $\beta$ <sup>+</sup> study participants. Data are shown as Spearman correlation coefficients (rho); lines are linear regression lines with 95% CI (shaded area).

## Supplementary Figure 6

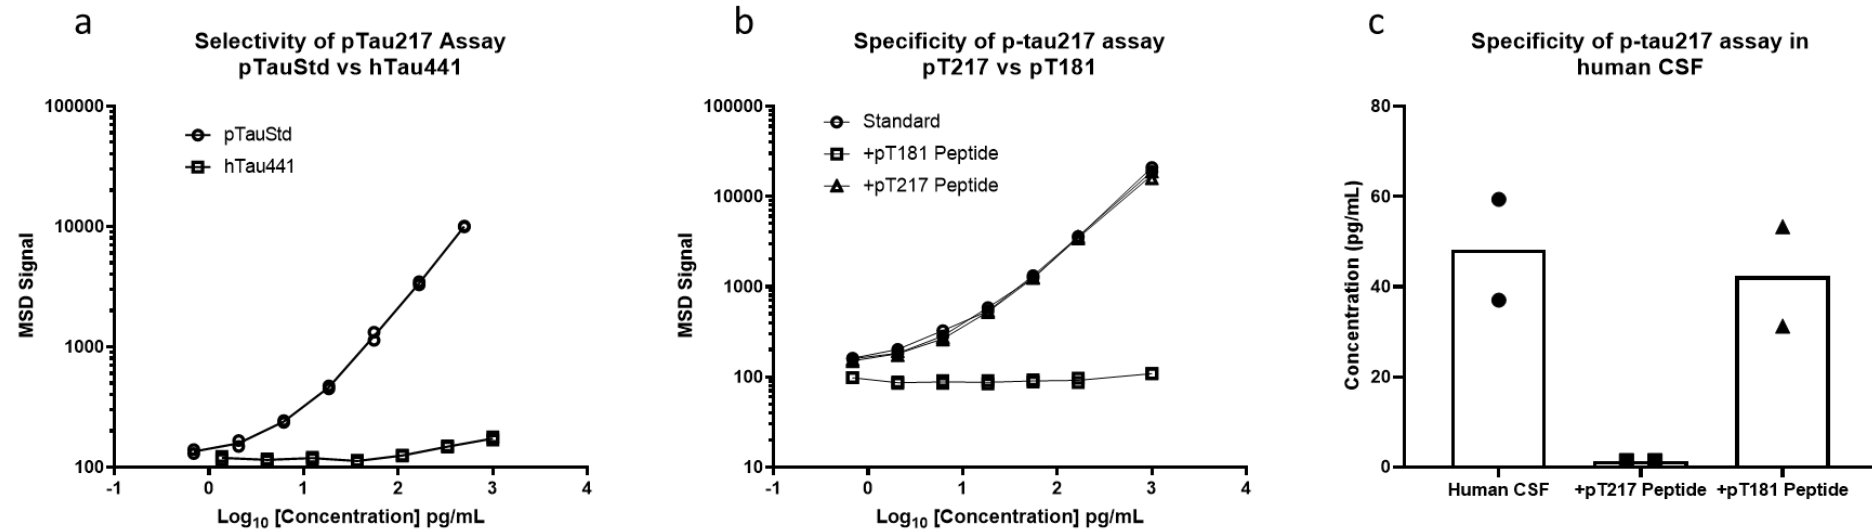

**Selectivity and Specificity of p-tau217 Assay.** (a) Selectivity is demonstrated through comparison of phosphorylated vs non-phosphorylated recombinant tau. Scatter plots are showing both replicates from the experiment and a mean connecting line is shown as visual aid only. (b and c) Specificity for the p-tau217 site was demonstrated both in assay buffer (b, replicates =2) and human CSF matrix (c, n=2). In (c), data are mean; both pTau217 peptide samples were below detection limit and results shown are imputed to the lower limit of quantitation.

## REFERENCES

1. Rosner, B., Wang W., Eliassen H., Hibert E. Comparison of Dependent Pearson and Spearman Correlation Coefficients with and without Correction for Measurement Error. *J Biom Biostat* **6**, 1-9 (2015).
2. Robin, X., *et al.* pROC: an open-source package for R and S+ to analyze and compare ROC curves. *BMC bioinformatics* **12**, 77 (2011).
3. Mattsson, N., *et al.* Comparing (18)F-AV-1451 with CSF t-tau and p-tau for diagnosis of Alzheimer disease. *Neurology* **90**, e388-e395 (2018).
